# Supplementary material for: Psychometric properties of the Multi-group Ethnic Identity Measure (MEIM) in a sample of Iranian young adults
Source: PeerJ. 2021 Feb 23;9:e10752. doi: 10.7717/peerj.10752 (PMC7908888; doi:10.7717/peerj.10752)
Supplement: Supplemental Information 1 [file peerj-09-10752-s001.csv]

Q1	Q2	Q3	Q4	Q5	Q6	Q7	Q8	Q9	Q10	Q11	Q12
2	2	2	2	4	4	3	1	4	4	3	3
2	2	2	2	2	1	2	3	2	2	2	2
2	2	2	2	4	4	2	1	4	2	4	4
3	2	3	2	3	2	2	2	3	2	3	2
3	3	2	2	3	3	4	3	4	3	4	4
4	3	3	4	4	4	4	3	4	3	4	3
3	2	3	2	4	4	3	3	4	3	4	4
3	2	4	1	4	4	3	1	4	3	1	4
2	2	2	3	3	2	2	3	2	3	2	3
3	3	4	4	4	4	3	4	4	4	4	4
3	3	3	3	3	3	2		3	2	2	3
4	1	3	2	4	3	2	2	3	2	3	3
3	3	3	3	4		3	3	4	4	4	4
4	3	3	3	4	4	3	3	4	4	4	4
3	3	3	2	4	4	3	4	4	4	4	4
4	3	4	4	4	4	4	4	4	3	4	4
3	4	4	3	4	4	4	3	3	4	3	4
1	2	2	2	3	2	2	2	3	2	2	2
3	3	3	2	3	2	3	3	4	3	3	4
3	3	3	3	4	4	4	3	4	3	4	3
4	3		3	4	2		4	4	4	4	4
2	2	2	3	3	3	2	2	3	3	3	3
2	1	3	1	3	3	3	2	2	2	2	3
3	2	3	3	4	4	4	4	4	4	4	4
3	2	2	2	3	2	2	2	3	2	2	4
3	3	3	3	3	4	3	4	4	3	4	4
3	1	2	2	3	3	1	2	3	4	3	3
2	2	2	2	3	2	2	4	4	4	3	3
3	4	4	3	4	4	3	4	4	4	4	4
4	4	3	1	4	4	3	4	4	4	4	4
3	4	4	1	4	4	4	4	4	3	4	4
3	4	3	1	4	4	3	3	4	4	4	4
3	2	2	3	2	2	3	2	2	2	2	2
2	2	2	1	3	1	2	3	2	2	1	2
3	2	4	4	4	4	3	4	4	4	4	4
4	3	3	2	3	3	2	3	4	4	3	3
3	1	4	1	4	4	4	3	4	3	4	4
2	1	3	2	2	2	2	2	2	2	2	2
3	2	3	3	4	4	3	3	4	3	4	4
3	2	3	2	3	3	3	4	4	3	2	3
4	4	4	4	3	4	1	1	4	4	4	3
3	2	3	2	3	2	2	2			2
3	3	3	3	4	4	3	2	4	3	3	3
1	4	2	1	4	4	2	3	4	3	4	4
2	1	3	2	3	2	2	2	4	4	2	3
3	3	3	3	3	2	3	3	3	3	2	2
2	1	3	1	3	2	2	2	2	3	2	3
4	3	4	4	4	4	4	2	4	2	3	3
3	1	2	1	2	2	2	2	3	3	2	3
3	3	3	1	2	2	3	2	3	3	3	3
3	2	3	2	4	3	2	2	2	3	2	3
3	2	2	4	4	3	3	3	3	4	3	4
3	1	2	1	3	3	3	3	4	2	3	3
3	3	3	2	3	3	3	2	2	2	3	3
3	1	2	2	4	4	3	4	4	4	3	4
4	3	4	4	4	4	4	4	4	4	4	4
3	2	3	3	2	2	2	4	3	3	3	3
1	1	3	2	3	3	3	3	4	2	3	3
3	4	4	3	4	4	4	4	4	3	4	4
4	2	4	3	4	4	4	3	4	4	4	4
1	2	2	1	3	3	2	3	4	3	4	3
3	3	4	4	4	3	3	2	4	3	4	3
3	1	3	2	3	3	3	2	2	3	3	2
2	1	3	1	1	2	3	3	4	2	2	3
4	4	3	3	4	4	3	3	4	4	4	4
3	2	3	3	3	3	2	3	4	3	3	2
3	3	3	4	4	4	3	4	4	4	4	4
4	2	4	3	3	3	3	2	3	3	3	3
4	4	4	3	4	4	4	4	4	4	4	4
4	4	3	4	4	4	3	3	3	3	3	4
3	3	3	3	4	4	3	4	4	3	4	4
3	1	2	3	3	3	2	2	3	2	2	3
2	2	3	2	2	4	4	2	4	3	3	4
4	3	4	1	4	4	3	4	4	4	4	4
3	3	2	3	3	3	3	3	3	2	2	3
4	2	3	4	4	4	4	4	4	4	4	4
4	3	3	3	4	4	3	4	4	4	4	4
3	3	3	3	4	4	4	4	4	3	3	4
3	3	3	3	3	3	3	3	3	3	3	3
3	2	3	3	3	3	3	3	3	3	3	3
2	1	3	2	4	4	3	3	4	4	3	4
2	1	4	2	2	1	4	3	1	2	1	1
3	2	3	1	4	3	4	4	4	4	3	3
3	2	3	2	3	3	3	2	3	1	3	4
1	1	1	3	3	1	2	3		1	2	2
3	3	2	2	4	2	2	1	2	2	1	3
2	3	2	3	3	3	2	3	3	3	2	3
2	2	2	2	3	2	2	2	3	2	3	3
3	2	4	2	3	3	2	2	3	4	3	3
3	3	3	4	4	3	4	3		3	3	4
4	4	4	3	4	4	3	4	4	4	4	4
3	2	4	3	4	3	3	4	4	3	4	4
1	1	2	1	3	4	2	3	3	3	3	3
1	1	3	2	4	4	3	1	4	1	3	3
3	1	3	3	3	2	2	2	2	4	3	3
3	3	3	4	4	4	4	4	4	4	4	4
2	3	3	4	4	4	4	4	4	4	4	4
3	2	2	2	2	3	2	3	4	4	3	3
2	2	3	2	4	4	4	4	4	4	4	4
3	2	3	2	2	2	2	3	4	4	3	3
3	2	3	3	4	4	3	3	3	3	3	3
3	2	4	3	2	2	2	2	2	3	2	4
2	3	2	1	2	2	2	3	3	3	2	2
4	3	3	4	3	4	3	3	4	4	4	4
2	1	3	4	3	1	2	2	1	2	1	2
3	2	2	3	4	4	3	3	3	2	3	3
3	1	3	2	2	2	2	3	2	3	2	3
1	4	4	2	4	4	4	2	4	4	2	3
1	1	3	1	4	3	3	1	4	1	1	3
2	2	4	4	3	3	3	3	4	4	3	3
2	3	3	3	4	4	4	3	3	2	3	4
2	2	2	2	4	4	3	3	4	4	4	3
2	4	3	3	4	4	3	3	4	4	4	4
3	3	3	2	3	3	2	2	4	3	2	3
1	1	2	3	3	3	2	1	4	2	3	3
1	3	2	2	2	2	2	2	3	2	3	3
3	4	4	3	4	4	4	3	4	4	4	4
3	3	4	3	4	4	4	4	4	4	4	4
3	3	3	3	3	3	4	4	4	4	3	4
2	1	1	1	3	2	3	2	3	2	3	2
4	2	3	2	4	4	1	4	4	2	4	4
1	2	3	3	4	4	3	3	4	3	4	4
3	2	4	4	3	3	3	3	4	4	3	3
2	1	2	2	4	4	3	2	4	4	4	4
3	3	3	4	3	3	3	3	3	4	4	4
3	3	3	4	4	4	3	4	4	4	3	3
4	4	3	3	4	4	4	4	4	4	4	4
3	2	3	2	3	3	3	3	3	3	3	3
4	2	4	4	4	4	4	4	4	4	4	4
3	2	2	3	3	3	3	3	3	3	2	2
2	2	3	2	3	2	2	2	2	2	2	3
2	1	1	2	3	3	3	3	3	3	3	4
4	3	3	2	4	4	4	4	4	4	4	4
2	2	3	2	3	3	3	2	3	2	2	2
1	2	2	3	3	2	3	3	3	1	2	2
1	3	1	3	3	3	3	2	3	2	2	3
2	3	3	4	4	3	3	4	4	4	3	3
3	2	3	3	4	4	4	3	4	3	3	3
3	4	4	4	3	4	4	4	4	4	4	4
2	2	2	3	3	3	3	2	3	2	2	3
1	1	1	1	3	3	2	1	3	3	2	3
3	3	4	4	4	4	4	3	4	4	4	4
4	4	4	4	4	4	4	4	4	4	4	4
3	3	3	3	4	3	3	3	3	3	3	3
4	3	4	4	4	4	4	4	4	4	4	4
3	2	3	4	3	3	2	4	3	3	2	4
2	3	3	3	4	4	3	2	4	4	4	4
2	2	3	3	4	3	3	3	4	4	3	3
2	2	3	3	4	4	3	3	4	3	3	3
4	4	4	4	4	4	4	3	4		4	4
2	1	3	3	2	3	4	2	4	2	4	3
4	2	4	4	3	4	3	3	4	4	4	4
4	3	4	4	4	4	4	4	4	4	4	4
3	1	3	3	4	4	4	3	4	3	4	4
3	2	2	3	3	3	2	2	3	3	3	3
3	3	3	4	4	4	4	3	4	3	4	4
4	3	4	4	4	4	4	4	4	3	3	4
4	2	3	3	4	4	3	4	4	3	3	2
4	2	4	4	4	4	4	4	4	3	4	4
3	3	4	4	4	4	4	4	4	3	4	4
4	4	3	4	4	4	4	4	4	4	4	4
4	4	4	4	4	4	4	4	4	4	4	4
3	2	4	4	4	4	4	3	4	4	4	3
4	2	3	4	2	2	3	3	4	4	4	4
3	3	3	2	3	2	2	3	3	3	3	3
3	2	3	2	3	3	2	2	2	3	3	2
3	3	4	3	4	4	4	3	4	3	4	4
4	2	4	2	4	3	3	3	3	3	3	3
3	3	3	2	4	4	4	3	4	3	4	4
3	2	3	2	3	3	3	3	3	3	3	3
4	3	3	2	4	4	3	4	4	3	3	4
4	3	4	4	3	4	3	4	2	4	4	4
2	1	2	3	1	3	2	3	1	3	2	3
4	3	4	3	4	4	3	3	4	4	3	3
2	3	3	3	4	3	3	2	4	3	3	4
3	2	2	3	3	3	3	3	3	2	3	3
3	2	3	3	3	3	3	2	2	3	3	2
2	1	2	3	2	2	2	3	3	3	2	3
3	3	3	3	3	3	3	2	3	3	3	3
3	2	3	3	4	3	3	3	3	3	3	3
3	2	3	2	3	3	2	2	2	2	2	3
4	4	4	4	4	4	4	4	4	4	4	4
4	3	3	3	4	4	4	4	4	4	3	4
3	2	3	3	3	3	3	2	3	3	3	3
2	2	3	2	4	3	3	2	4	3	3	4
3	3		4	3	3	4	3	3	3	3	3
3	3	4	4	3	3	4	4	4	3	3	3
3	3	3	3	3	3	3	3	3	4	3	3
2	3	2	3	4	4	3	3	3	3	3	3
2	1	4	4	4	4	4	3	4	3	4	4
1	1	2	1	3	2	1	2	3	3	2	3
3	2	3	3	4	4	4	4	4	4	4	4
4	3	4	4	4	4	4	3	4	4	4	4
3	2	4	4	4	4	4	3	4	2	3	4
1	1	2	4	1		1	1	1	1	1	1
2	1	3	1	1	1	2	4	4	4	4	4
3	3	3	3	3	3	3	3	3	4	4	3
4	4	4	3	4	4	4	4	4	3	4	3
3	3	4	4	4	4	4	4	4	4	4	4
3	1	4	3	4	4	4	4	4	4	4	4
2	2	2	2	3	3	2	3	3	3	2	3
4	3	3	4	2	3	2	3	2	3	2	3
3	2	3	2	3	3	3	2	3	3	3	3
3	3	4	3	4	3	3	3	4	4	4	4
3	3	3	3	4	4	3	4	3	3	3	4
2	2	3	3	4	4	4	2	4	4	4	4
3	3	3	3	4	4	3	2	4	4	4	4
2	2	3	3	3	2	3	2	3	3	2	3
2	1	1	1	4	3	1	1	4	4	3	3
2	2	3	1	4	4	3	2	3	3	3	3
3	1	3	1	3	2	2	3	3	3	2	3
1	2	1	2	3	2	2	1	3	3	3	3
3	2	3	2	3	3	3	2	3	3	3	3
3	2		2	3	3	2	2	3	3	2	4
2	1	2	1	3	2	2	4	3	2	2	3
2	2	2	1	1	1		1	2	3	2
3	3	3	2	4	4	3	4	4	4	4	4
4	2	4	4	3	3	4	4	3	3	3	2
2	1	2	1	3	2	2	2	3	2	3	2
3	3	4	3	4	4	4	3	4	4	4	4
3	3	3	2	3	3	3	3	3	3	3	2
3	1	3	2	3	3	3	2	3	4	4	4
3	1	2	1	2	2	2	1	1	2	1	2
3	1	4	3	4	4	4	4	4	4	4	4
3	2	3	3	3	3	3	3	3	3	3	3
4	4	4	4	4	4	3	3	4	3	4	4
4	4	4	1	4	4	4	1	4	4	4	4
4	4	4	3	3	4	4	4	4	4	4	4
2	3	3	2	4	3	2	3	4	3	3	3
3	3	3	3	3	3	3	3	4	3	4	4
2	1	3	3	3	3	3	4	4	3	3	3
3	3	4	4	4	4	4	3	4	3	4	4
2	2	3	3	3	2	3	1	3	3	2	3
1	2	2	3	4	4	3	2	3	2	1	2
3	3	4	3	4	4	3	3	4	4	4	4
2	2	3	2	3	3	2	2	3	3	3	3
3	2	3	3	3	3	3	3	4	2	4	4
3	2	3	1	3	2	2	2	3	3	3	3
3	2	3	1	3	2	2	2	3	3	3	3
3	2	3	2	3	3	3	2	3	3	3	3
4	2	4	4	4	4	4	4	4	3	4	4
4	2	4	3	4	4	3	4	4	4	3	4
2	2	2	2	4	3	3	2	3	2	3	3
3	2	3	2	3	2	3	3	3	3	2	3
3	1	3	2	4	4	3	3	4	3	4	4
2	2	2	2	2	2	2	2	2	2	2	2
4	3	4	4	4	4	4	3	4	4	4	4
2	2	2	3	3	2	3	3	2	3	2	3
2	2	3	3	4	4	3	3	3	2	3	2
4	3	4	3	4	4	3	4	4	4	4	4
3	2	4	3	4	4	4	4	4	3	4	3
3	2	2	2	3	2	3	2	2	4	2	3
2	2	3	3	3	3	3	3	3	2	3	3
2	3	2	2	3	2	2	2	3	2	2	3
3	1	4	4	4	4	4	4	4	4	4	4
3	2	3	2	4	4	3	3	4	3	3	3
2	3	3	3	2	2	3	2	2	3	2	3
3	1	4	3	4		3	3	2	3	2	4
2	2	2	2	4	3	3	3	4	3	3	4
3	3	3	3	4	4	4	4	4	4	4	4
3	2	3	3	3	3	3	3	2	3	3	3
3	3	3	3	4	2	3	4	3	3	2	3
2	2	2	2	3	3	3	2	3	4	4	3
2	2	3	3	3	2	2	2	3	2	2	3
3	2	4	2	4	4	3	3	3	4	4	4
3	2	3	2	3	3	4	4	3	4	4	3
2	3	2	4	3	3	3	2	3	4	3	3
1	1	3	3	2	1	3	1	1	2	1	2
3	2	3	2	3	2	2	3	3	3	2	3
1	1	2	1	4	2	2	3	3	3	2	3
4	3	4	3	4	4	3	4	4	3	4	4
3	2	3	3	3	3	2	2	4	3	3	3
3	3	3	3	3	3	4	3	4	3	4	3
3	4	3	4	4	3	3	4	3	2	3	3
4	3	4	1	3	2	4	4	3	4	3	3
4	2	4	4	4	4	4	4	4	4	4	4
3	4	3	3	4	4	3	3	3	3	3	3
3	2	2	3	3	2	3	2	3	3	2	3
2	1	2	2	3	3	3	2	3	2	3	3
2	2	2	3	2	2	2	2	2	2	3	3
2	2	2	2	3	2	2	2	2	3	3	3
2	3	2	3	3	3	3	4	4	4	4	4
1	1	2	2	1	1	1	1	2	1	1	2
3	3	4	4	4	4	4	4	4	4	4	4
2	2	2	2	3	4	4	3	4	4	4	4
4	2	3	2	4	4	3	3	4	3	3	3
4	3	3	1	4	3	2	4	4	4	3	4
3	2	3	3	4	3	3	2	3	3	3	3
3	3	3	3	4	4	4	4	4	4	4	4
3	2	3	3	3	3	3	4	4	3		4
3	3	3	3	3	3	3	3	4	4	4	4
4	1	4	1	4	4	3	4	4	4	4	4
4	3	2	2	3	4	2	3	3	4	3	3
3	1	3	1	4	4	3	2	4	4	4	3
1	1	2	3	2	1	1	1	1	1	1	1
1	2	2	3	3	3	3	3	4	2	3	3
3	2	3	3	4	3	3	3	3	2	3	4
4	3	3	4	3	4	3	2	3	4	3	3
2	1	3	3	2	2	2	2	3	2	3	3
4	2	4	3	2	2	3	4	2	2	2	3
1	1	1	1	4	1	1	1	4	1	1	1
1	1	1	3	4	4		2	3	4	4	3
2	2	3	2	3	3	3	2	3	4	3	3
2	2	2	2	4	4	4	2	4	4	4	4
3	2	3	2	3	1	1	1	3	1	1	1
1	1	1	1	1	1	1	1	1	1	1	1
3	1	3	3	3	3	2	2	3	2	2	4
4	3	4	4	4	3	4		3	4	4	4
2	2	3	2	4	4	4	3	4	4	4	4
4	3	4	4	4	4	3	3	4	4	3	4
2	1	1	1	1	1	1	1	1	1	1	1
4	3	4	3	2	2	2	3	3	3	1	3
3	2	2	2	3	2	2	2	3	3	2	3
3	1	3	4	4	4	4	3	4	4	4	3
1	3	2	2	4	4	3	2	3	2	3	3
3	3	2	3	4	3	4	4	4	4	3	3
2	3	3	2	3	3	3	2	3	2	3	3
4	4	4	4	4	3	3	3	3	4	4	4
4	3	2	3	4	4	3	3	3	2	2	2
4	3	2	3		4	4	3	2	2	3	3
2	2	3	2	3	1	2	2	2	1	1	3
2	1	2	2	3	2	2	2	3	2	3	3
1	3			3	3	3	4	2	3	2	4
3	2	3	2	4	4	4	3	4	3	4	4
2	2	2	3	1	3	3	4	4	4	3	3
4	3	4	3	4	4	4	3	4	4	4	4
1	1	1	1	2	1	1	1	2	2	1	2
3	2	3	3	3	2	3	3	2	3	2	3
2	1	1	3		1	2	1		3	1	2
2	1	3	1	4	2	3	2	3	3	3	4
3	4	4	3	3	3	3	3	2	3	3	3
3	2	3	2	3	3	3	2	3	2	2	3
3	3	3	3	4	4	4	4	4	4	4	4
2	2	3	2	3	3	3	2	3	3	3	3
3	2	3	4	4	4	3	4	3	4	3	3
3	1	3	1	2	2	2	2	2	3	2	3
4	4	4	3	4	4	3	3	4	4	4	4
4	2	4	2	4	4	4	4	4	4	4	4
2	2	3	1	2	1	2	3	3	2	2	3
3	1	3	2	3	2	2	3	2	3	2	2
3	1	3	2	3	4	3	1	4	4	4	4
3	2	3	3	3	3	2	3	3	2	3	3
2	1	1	1	1	1	1	1	1	1	1	1
3	2	3	1	4	1	1	1	1	1	1	4
4	2	3	3	4	3	3	3	3	2	3	3
1	2	3	2	2	3	3	3	3	3	2	3
2	1	2	1	1	2	1	2	2	1	2	2
2	3	2	2	4	4	4	2	4	2	4	4
3	3	3	3	3	3	3	3	3	3	3	3
3	4	4	2	4	4	4	2	4	4	4	4
3	3	2	2	3	3	2	2	3	2	3	3
3	2	3	3	3	3	3	4	4	4	3	4
2	2	3	3	3	3	3	2	3	2	3	3
3	2	2	2	3	3	2	2	3	3	2	3
2	2	2	2	2	2	2	3	2	3	2	3
2	1	2	1	2	2	3	2	2	2	2	2
2	3	3	2	4	4	3	3	3	2	3	3
2	1	1	1	2	2	2	2	2	2	2	2
3	3	3	3	3	4	2	3	3	4	4	4
2	2	4	3	4	4	4	2	4	3	3	3
2	2	2	3	4	4	3	2	2	3	3	3
1	1	1	1	1	3	2	1	1	1	1	2
4	2	3	3	3	3	2	2	3	3	3	3
3	3	4	3	3	3	3	3	3	3	3	3
3	4	2	3	3	3	3	2	3	3	3	3
3	4	3	4	2	3	4	4	2	3	3	3
3	3	4	2	3	2	3	3	2	3	2	3
2	3	1	1	3	1		1	3	1	3	2
3	2	2	2	3	3	2	3	3	3	3	3
3	2	3	2	3	3	3	3	3	3	2	3
3	4	3	4	4	4	4	2	3	3	3	2
3	2	3	2	4	1	3	2	3	2	1	4
3	2	2	3	3	3	2	2	3	3	3	3
3	2	2	3	1	3	1	2	3	3	3	4
3	2	3	3	3	3	4	4	4	3	3	3
2	2	2	2	4	3	2	3	3	2	3	3
2	3	2		3	3	3	1	3	2	3	3
3	2	3	3	3	3	3	3	3	2	3	3
1	3	3	1	3	3	2	3	3	3	2	3
1	3	1	2	3	3	3	2	2	2	3	4
2	2	2	2	2	3	3	3	3	3	2	3
3	3	4	4	4	4	3	4	4	3	4	3
2	2	2	3	4	4	3	4	4	4	4	4
3	1	2	2	3	3	3	4	4	3	4	4
1	2	1	2	4	1	1	1	2	1	1	3
2	3	2	1	2	2	2	3	3	3	2	2
2	2	2	2	2	2	2	2	2	4	2	3
2	3	1	1	2	1	2	3	2	1	3	2
2	2		2	4	4	3	3	4	2	3	3
2	1	3	4	4	4	4	4	4	3	4	4
2	2	2	3	3	3	3	2	2	3	2	3
2	3	4	4	4	4	4	4	4	3	3	1
3	3	4	4	3	3	3	3	3	2	3	3
1	1	2	2	2	3	2	1	3	2	3	4
2	3	2	2	2	2	2	1	1	2	2	2
2	2	3	3	2	2	3	4	3	2	2	3
2	3	2	2	4	4	2	2	4	2	3	3
1	1	3	1	4	2	3	4	3	1	1	1
1	4	1	2	3	3	3	2	3	4	3	4
3	2	3	2	3	2	2	2	3	2	2	3
2	2	2	3	2	2	2	2	2	2	2	2
3	2	3	2	3	3	3	3	3	3	3	3
3	2	3	3	4	3	3	2	3	2	3	3
1	1	1	2	3	2	2	1	3	3	2	2
3	2	4	2	3	4	4	2	4	2	4	4
3	3	2	2	4	3	2	2	3	4	3	3
2	2	2	3	3	3	3	3	3	3	2	3
3	1	2	1	4	4	3	2	4	2	3	4
2	2	3	2	3	3	3	2	2	3	2	3
2	2	2	2	3	3	2	2	3	2	3	3
2	2	2	2	3	3	3	2	2	3	3	3
3	2	3	2	2	3	2	3	3	3	3	3
2	3	3	2	3	3	3	2	3	1	3	4
3	3		4	4	4	3	2	4	3	3	4
2	1	2	1	2	2	3	1	2	2	2	3
3	3	3	2	3	3	3	2	3	2	2	3
3	4	3	2	3	3	3	2	3	4	4	3
1	1	1	1	1	3	2	2	3	1	3	3
2	2	3	3	3	4	3	2	4	3	4	3
1	1	1	3	2	1	1	1	1	1	1	3
3	3	2	2	3	2	3	2	2	3	2	4
2	2	2	2	3	2	2	2	2	2	2	2
1	1	1	2	2	3	2	1	2	1	1	1
1	1	1	1	3	3	2	1	3	1	3	4
2	3	3	3	4	4	4	3	4	4	4	4
4	2	4	4	4	4	4	4	4	4	4	4
